# Supplementary material
Source: Springer Nature journal article supplement (https://www.springermedizin.de/resource/supplementary/12881_2010_726_MOESM2_ESM.pdf/9450968)

A

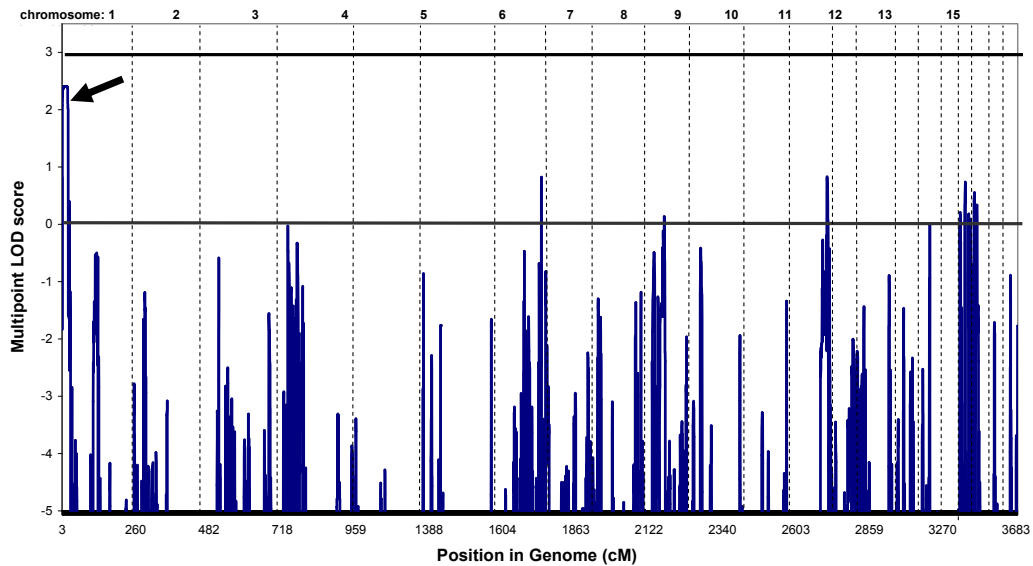

B

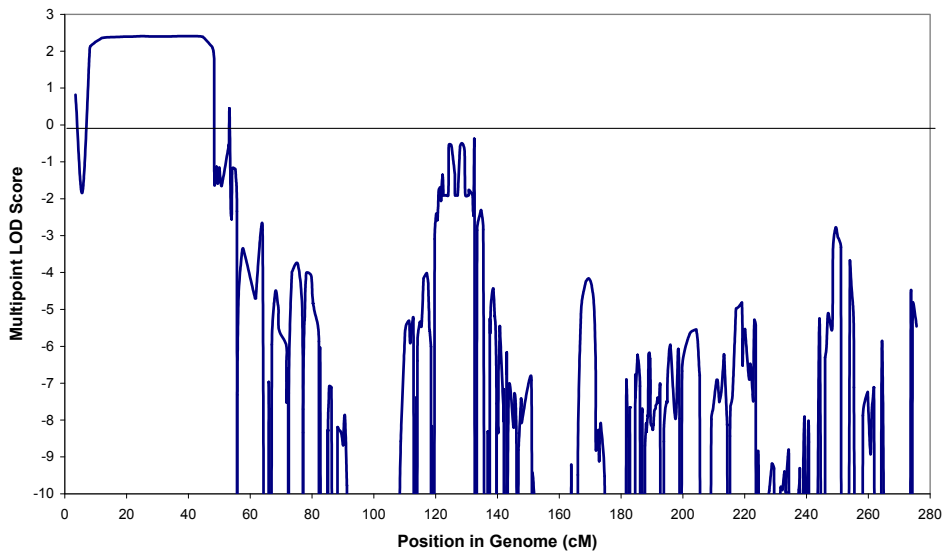

Supplement: MOESM2 [file 9450968]
